1 **Title:** Self-beneficial belief updating as a coping mechanism for stress-induced negative affect

2 **Authors:**

3 Nora Czekalla<sup>1</sup>, Janine Baumann<sup>1</sup>, David S. Stolz<sup>1</sup>, Annalina V. Mayer<sup>1</sup>, Johanna F. Voges<sup>1</sup>, Lena

4 Rademacher<sup>1</sup>, Frieder M. Paulus<sup>1</sup>, Sören Krach<sup>1</sup>, Laura Müller-Pinzler<sup>1</sup>

5 **Affiliations:**

6 <sup>1</sup>Social Neuroscience Lab at the Translational Psychiatry Unit (TPU), Department of Psychiatry and

7 Psychotherapy, University of Lübeck, Ratzeburger Allee 160, D-23538 Lübeck, Germany

8 **\*Email addresses of corresponding authors:**

9 Nora Czekalla nora.czekalla@uni-luebeck.de

10 Laura Müller-Pinzler laura.mueller-pinzler@uni-luebeck.de

11 **\*Postal address of corresponding Authors:**

12 Nora Czekalla & Laura Müller-Pinzler

13 Department of Psychiatry and Psychotherapy,

14 Center of Brain, Behavior, and Metabolism (CBBM)

15 University of Lübeck, Ratzeburger Allee 160, D-23538 Lübeck, Germany

16 Phone: +49 451 3101 7510

17

18 **Keywords:** Self-related belief updating, social-evaluative stress, coping, affective recovery, cortisol

19

## Title

20 Self-beneficial belief updating as a coping mechanism for stress-induced negative affect

21

## Abstract

22 Being confronted with social-evaluative stress elicits a physiological and a psychological stress  
23 response. This calls for regulatory processes to manage negative affect and maintain self-related  
24 optimistic beliefs. The aim of the current study was to investigate the affect-regulating potential of  
25 self-related belief updating after exposure to social-evaluative stress, in comparison to non-social  
26 physical stress or no stress. We assessed self-related belief updating using trial-by-trial performance  
27 feedback and described the updating behavior in a mechanistic way using computational modeling.  
28 We found that social-evaluative stress was accompanied by an increase in cortisol and negative affect  
29 which was related to a shift in self-related belief updating towards the positive direction. This self-  
30 beneficial belief updating, which was absent after physical stress or control, was associated with a  
31 better recovery from stress-induced negative affect. This indicates that enhanced integration of  
32 positive self-related feedback can act as a coping strategy to deal with social-evaluative stress.

33

34

## Introduction

35 Human beings strive to be accepted by others and to maintain a positive social image<sup>1</sup>. Thus, social  
36 evaluation from others can pose a threat to our social image, eliciting a stress response in our body<sup>2-</sup>  
37 <sup>4</sup>. This initiates various physiological processes<sup>5</sup> and is associated with negative affective  
38 consequences, like anxiety or embarrassment<sup>6-8</sup>. Social evaluation, however, is fundamental to self-  
39 related learning processes as it gives one the opportunity to integrate the feedback we receive from  
40 others and update the beliefs about ourselves accordingly<sup>9,10</sup>. Biases in how we process self-related  
41 feedback, i.e. whether we focus more on negative or positive feedback, impact our affective  
42 reactions<sup>11,12</sup> and, in the case of self-serving processing, may function as a coping strategy<sup>11</sup>. While  
43 (social) stress is a risk factor for many psychiatric conditions<sup>13</sup>, successful coping is an important factor  
44 in maintaining mental health<sup>14</sup>. In the current study we implemented a computational modeling  
45 approach to investigate the coping mechanism of self-beneficial belief updating after social-evaluative  
46 stress and tested whether shifted information processing after stress predicts recovery from stress-  
47 induced negative affect.

48 When we receive feedback regarding ourselves, information processing and belief updating is shaped  
49 by self-relevant motivations<sup>15</sup>, especially the motivation to maintain optimistic beliefs about the self<sup>16</sup>.  
50 Many studies have demonstrated that the process of self-related belief updating is biased in favor of  
51 positive information, i.e. self-related beliefs are updated more strongly when feedback is better than  
52 expected<sup>17-20</sup>. However, updating biases towards negative feedback have been reported in  
53 performance contexts<sup>21,22</sup>, which indicates that the context of learning, type of feedback and prior  
54 assumptions are important factors when explaining self-related belief updating biases.

55 While there are only relatively few studies on the effects of stress on self-related belief updating,  
56 various studies on reward processing and non-self-related feedback processing have shown that stress  
57 is an influencing factor in this regard. One key mechanism for feedback-based learning is the prediction  
58 error signal, indicating the difference between a predicted and an actual outcome<sup>23,24</sup>, which is being  
59 minimized by updating beliefs during learning. This signal is generated by dopaminergic neurons of the

60 ventral striatum<sup>25</sup>, which might be particularly important for the stress-induced modulation of  
61 prediction error signals as the dopamine system is sensitive to stress<sup>26,27</sup>. However, these effects  
62 depend on the type, intensity and schedule of the stress exposure<sup>28</sup>, which might also explain  
63 heterogeneous effects of stress on reward processing and feedback-based learning. Research on  
64 declarative memory has shown that timing of stress matters<sup>29</sup>, which seems to be important for  
65 feedback-based learning as well<sup>30</sup>. Initially, acute stress (e.g. a threat of a shock during learning), mainly  
66 characterized by a rapid sympathetic response, impairs feedback-based learning of reward<sup>31</sup>. Neurally,  
67 acute stress attenuates the response to reward in the striatum and orbitofrontal cortex<sup>32,33</sup> and  
68 enhances the striatal response to aversive feedback<sup>34</sup>. Accordingly, under acute stress self-related  
69 belief updating is more strongly driven by unfavorable feedback, i.e. the learning bias in favor of  
70 positive information (optimism bias) usually found in self-related belief updating is absent<sup>35</sup>. The  
71 opposite effects are reported when learning takes place with a delay to stress (e.g. after a public  
72 speech), a phase mainly characterized by an increase of cortisol<sup>29</sup>. Here, non-self-related feedback  
73 processing is more strongly driven by stimuli signaling reward and possibly associated with stress-  
74 induced cortisol change<sup>36</sup> while learning from negative feedback is decreased, potentially linked to  
75 cortisol levels before learning<sup>37</sup>. On the neural systems level, stress recovery is associated with  
76 increased striatal responses to rewarding feedback at 50 min after stress<sup>30,38</sup>. Moreover, specifically  
77 individuals with low striatal reward reactivity showed an association of recent life stress with lower  
78 positive affect, which makes striatal reactivity a potential factor of successful stress coping<sup>39</sup>.

79 According to classic appraisal theories of stress<sup>40</sup>, different strategies such as seeking social support,  
80 positive revaluation or acceptance are helpful in coping with stress-induced negative affect<sup>40-42</sup>. In the  
81 context of social-evaluative stress a self-protection strategy is to view oneself in a positive light, i.e.  
82 emphasizing the own desirability, focusing on own successes and attributing failure externally<sup>43</sup>. This  
83 strategy has also been successful in alleviating stress-induced negative affect following a performance  
84 situation<sup>11,44</sup>. Generally, an optimistic way of processing self-related feedback has been associated with  
85 better mental health<sup>45,46</sup>. On the contrary, processing self-related feedback in a more negative way

86 may result in negative beliefs about the self<sup>47</sup> and ultimately lead to lower self-esteem or depressive  
87 symptomatology. Studies on self-related belief updating in individuals with depression suggest that  
88 information processing is distorted in a negative direction<sup>48</sup> and that coping strategies for situations of  
89 social-evaluative stress are less readily available in these patients<sup>49</sup>.

90 In the present study, we aim to investigate the specific effects of social-evaluative stress on self-related  
91 belief updating and the propensity to engage into self-beneficial belief updating after social-evaluative  
92 stress as compared to non-social physical stress. By means of two well validated and highly reliable  
93 paradigms, the Trier Social Stress Test<sup>3</sup> (public speech) and the Cold Pressor Test<sup>50</sup>, as well as a no  
94 stress control condition, we directly manipulated levels of social-evaluative stress in a between-groups  
95 design. After stress manipulation we assessed participants' self-related belief updating behavior with  
96 the learning of own performance (LOOP) task<sup>21</sup>, in which participants form beliefs about their abilities  
97 in novel behavioral domains. We then used participants' learning bias from positive and negative  
98 feedback to predict their recovery from stress-induced negative affect. We found that social but not  
99 physical stress shifted subsequent self-related belief updating in a more self-beneficial direction which  
100 predicted better recovery from negative affect. We elaborate on the relationship between stress, self-  
101 related belief updating and affect regulation in healthy participants and discuss the potential of our  
102 findings for a better understanding of maladaptive self-related belief systems in psychiatric conditions  
103 such as depression.

## 104 **Results**

105 After exposure to social-evaluative stress (SOC, Trier Social Stress Test), non-social, physical stress  
106 (PHY, Cold Pressor Test) or a no stress control condition (CON, reading) participants performed the  
107 LOOP task<sup>21</sup>, which was covered as a measure of cognitive estimation skills (see Fig. 1). The central idea  
108 of the LOOP task is to create a performance context and provide manipulated positive or negative  
109 feedback in comparatively neutral domains in which people have only vague prior assumptions. By  
110 this means, individuals form a concept about their own abilities over the course of the experiment. In  
111 a previous study, we showed that this process of self-related belief updating can be described best by

112 a computational prediction error learning model (adapted from Rescorla and Wagner<sup>51</sup>) with two  
113 separate learning parameters for positive and negative prediction errors<sup>21</sup>. During the LOOP task,  
114 participants were asked to answer estimation questions in two different estimation domains (e.g.  
115 estimating the weight of animals and the height of buildings) and received manipulated performance  
116 feedback implying a rather good performance in one category and a rather bad performance in the  
117 other one (high vs. low ability condition). In the beginning of each trial participants saw a cue indicating  
118 the estimation category and had to rate their expected performance for the upcoming estimation  
119 question in this category. A manipulated feedback on their estimation performance in relation to an  
120 alleged reference group was presented afterwards. Saliva cortisol as well as negative affect, including  
121 perceived stress, embarrassment, anger, and frustration, were assessed several times during the  
122 experiment. Pre-stress baseline measures ( $T_{1\text{AFF/CORT}}$ ) were taken after a ten-minute-period of rest in  
123 the beginning of the session. Post-stress negative affect was rated immediately after the stress  
124 exposure or control task ( $T_{2\text{AFF}}$ ) to calculate the mean change of negative affect ( $\Delta\text{AFF}$ ). Post-stress  
125 cortisol samples were taken after another 10-minute period of rest ( $T_{2\text{CORT}}$ ) to calculate the mean  
126 cortisol change ( $\Delta\text{CORT}$ ). After performing the LOOP task, saliva samples and negative affect were  
127 again obtained ( $T_{3\text{AFF/CORT}}$ ) to measure stress recovery (for a detailed description see methods).

128 **Cortisol response and negative affect.** *Cortisol.* The stress manipulation was effective and social-  
129 evaluative stress, as well as physical stress, led to a stronger increases of cortisol levels from baseline  
130  $T_{1\text{CORT}}$  to post-stress  $T_{2\text{CORT}}$  than in the no stress control group (Scheirer-Ray-Hare test controlled for  
131 time of the day [TIME]: main effect factor Stress group  $H_2 = 18.9$ ,  $p < .001$ , post-hoc Dunn-Bonferroni-  
132 Tests for factor Stress group: SOC vs. CON:  $z = -4.29$ ,  $p < .001$ ; PHY vs. CON:  $z = -2.76$ ,  $p = .018$ ). There  
133 was no statistically significant difference between the two stress groups (SOC vs. PHY:  $z = 1.56$ ,  $p = .355$ ;  
134 baseline cortisol levels did not significantly differ between groups  $H_2 = 1.74$ ,  $p = .419$  controlled for  
135 TIME, see Fig. 2a and Supplementary Fig. S1 and Table S1).

136 *Negative affect.* Mean negative affect increased significantly after social-evaluative stress but not after  
137 physical stress compared to the control group (Kruskal Wallis test:  $H_2 = 43.9$ ,  $p < .001$ , post-hoc Dunn-

138 Bonferroni-tests: SOC vs. CON ( $z = -6.45$ )  $p < .001$ , PHY vs. CON ( $z = -1.88$ )  $p = .182$ , SOC vs. PHY ( $z = -$   
139  $4.59$ )  $p < .001$ ; baseline negative affect did not significantly differ between groups ( $H_2 = 3.2$ ,  $p = .201$ ;  
140 see Fig. 2b and Supplementary Fig. S2).

141 **Forming self-related beliefs over time.** In a model free behavior analysis we replicated previous  
142 findings regarding the LOOP task which indicates self-related belief updating in response to the  
143 feedback<sup>21</sup>. Over the time of 30 trials, participants adapted their performance expectation ratings (EXP)  
144 towards the positive and negative feedback of the two ability conditions, i.e. they updated their self-  
145 related beliefs (Fig. 3a, significant factor Ability condition high vs. low  $t_{86} = 8.52$ ,  $p < .001$ , significant  
146 Trial x Ability condition interaction  $t_{5156} = 32.72$ ,  $p < .001$ ). Social-evaluative stress modulated self-  
147 related belief updating over time, i.e. performance expectation ratings became increasingly higher  
148 compared to physical stress or no stress (Trial x Ability condition x Stress group split into the contrasts  
149 social [SOC] vs. non-social [PHY, CON] and the orthogonal contrast PHY vs. CON: interaction for  
150 contrast SOC vs. [PHY, CON];  $t_{5156} = 4.01$ ,  $p < .001$ ). In the physical stress group performance  
151 expectation ratings were even more negative over time than in the no stress control condition (Trial x  
152 Ability condition x Contrast PHY vs. CON  $t_{5156} = -2.15$ ,  $p = .031$ ; see Supplementary Table S2).

153 **Model selection for computational models of learning behavior.** To capture the updating of the  
154 performance expectation ratings over time in a learning model, a similar model comparison to that of  
155 Müller-Pinzler et al.<sup>21</sup> was performed. All three main models of the model space followed the idea of  
156 a Rescorla-Wagner model with one or two learning rates for each participant reflecting the degree to  
157 which people weighted prediction errors ( $PE = Feedback_t - EXP_t$ ) to update their expectation rating (see  
158 Fig. 4 and for model descriptions see method section).

159 In line with Müller-Pinzler et al.<sup>21</sup>, the Valence Model outperformed all other models in all three groups  
160 according to Bayesian Model Selection<sup>52</sup> (protected exceedance probability for the whole sample  
161  $pxp_{total} > .999$ , Bayesian omnibus risk  $BOR_{total} < .001$  as well as separately for the three groups  
162  $pxp_{SOC} = .985$ ,  $BOR_{SOC} = .019$ ,  $pxp_{PHY} > .999$ ,  $BOR_{PHY} < .001$ ,  $pxp_{Control} > .999$ ,  $BOR_{Control} < .001$ ; see Table  
163 1 and Supplementary Table S3 for more details on model comparisons). This model, with two separate

164 learning rates for positive PEs ( $\alpha_{PE+}$ ) and negative PEs ( $\alpha_{PE-}$ ) across ability conditions, assumes that  
165 learning differs depending on the valence of prediction errors. Learning parameters from the Valence  
166 Model were used for further analysis.

167 The modeled performance expectations of our winning model predicted the performance expectation  
168 ratings on the individual subject level within each ability condition with  $R^2 = 0.33 \pm 0.24$  ( $M \pm SD$ ).  
169 Repeating the model free analysis with the modeled performance expectations confirmed the results  
170 from the original analysis (see Supplementary Table S4).

171 **Stress and learning parameters.** In line with Müller-Pinzler et al.<sup>21</sup>, the physical stress and no stress  
172 control group showed a negativity bias in their learning behavior, i.e. a stronger self-related belief  
173 updating after negative than positive prediction errors ( $\alpha_{PE+}$  vs.  $\alpha_{PE-}$  within group comparison for PHY:  
174  $W = 100$ ,  $Z = -2.73$ ,  $p = .005$  and CON:  $W = 84$ ,  $Z = -2.89$ ,  $p = .003$ , Wilcoxon test). This negativity bias  
175 was absent after social-evaluative stress ( $\alpha_{PE+}$  vs.  $\alpha_{PE-}$  within group comparison for SOC:  $W = 193$ ,  $Z = -$   
176  $0.53$ ,  $p = .609$ ; significant PE-Valence x Contrast SOC vs. [PHY, CON] interaction  $b_{VALXSOC} = 0.114$ ,  $t_{85} =$   
177  $2.30$ ,  $p = .024$ , PE-Valence x Contrast PHY vs. CON:  $b_{VALXPHY} = -0.036$ ,  $t_{85} = -0.72$ ,  $p = .471$ ; betas  
178 standardized, see Fig. 3b and Supplementary Table S5).

179 To better capture biased learning behavior, a valence bias score was computed  
180 (valence bias score =  $(\alpha_{PE+} - \alpha_{PE-}) / (\alpha_{PE+} + \alpha_{PE-})$ )<sup>21,53,54</sup>, which represents updating after positive compared  
181 to negative prediction errors. More positive valence bias scores indicate more self-beneficial belief  
182 updating, while negative valence bias scores speak for stronger self-related belief updating after  
183 negative feedback.

184 *Negative affect predicts subsequent self-beneficial belief updating.* We found that a stronger increase  
185 in negative affect ( $T2_{AFF} - T1_{AFF}$ ) predicted more self-beneficial belief updating ( $\rho_{\Delta AFF, BIAS} = .25$ ,  $p = .019$ ,  
186 Spearman correlation for the whole sample, see Fig. 5b). Also, a higher increase in in cortisol levels  
187 (saliva samples  $T2_{CORT} - T1_{CORT}$ ) predicted more self-beneficial belief updating ( $\rho_{\Delta CORT, BIAS|TIME} = .29$ ,  $p =$



188 .006, partial Spearman correlation controlled for TIME for the whole sample, for further information  
189 see Supplementary Results and Supplementary Table S6).

190 *Learning rates and stress recovery.* A more positive valence bias score predicted better recovery from  
191 stress-induced negative affect during learning (REC, change in negative affect post-stress  $T_{2AFF}$  - post-  
192 learning  $T_{3AFF}$ ,  $\rho_{BIAS,REC|\Delta AFF} = .23$ ,  $p = .043$  [partial Spearman correlation for the whole sample controlled  
193 for the increase in negative affect ( $T_{2AFF} - T_{1AFF}$ )]). This supports the idea of self-beneficial belief  
194 updating as a coping strategy. Analysis of the social-evaluative stress group only confirmed this effect  
195 (Fig. 5b,  $r_{BIAS,REC|\Delta AFF} = .38$ ,  $p = .045$  [partial Pearson correlation controlled for the increase in negative  
196 affect]).

## 197 **Discussion**

198 After being devalued for example at work or school we need to empower ourselves in order to uphold  
199 or boost our self-image. Research has shown that the ability to adopt a positive attitude towards  
200 oneself after receiving criticism is central to positive affect and good mental health outcomes in the  
201 long run<sup>11,46,55</sup>. In the current study we investigated how people apply self-beneficial belief updating  
202 during a performance feedback situation as a means to counter their negative affect. Using  
203 computational modelling, we provide a mechanistic explanation on how individuals engage in more  
204 self-beneficial belief updating after experiencing a threat to their social image and how this shift in  
205 social learning of self-related information predicts recovery from stress-induced negative affect.

206 The positive shift of self-related belief updating after social-evaluative stress, going along with a better  
207 recovery from negative affect, fits nicely to the notion of a belief's own value as recently posited by  
208 Bromberg-Martin and Sharot<sup>15</sup>. In their revised framework, general belief updating is not solely driven  
209 by external outcomes like rewards or punishments but also by the agent's motivation to optimize  
210 internal states like positive affect<sup>15</sup>. In the present study we show this direct link between self-related  
211 belief updating and a change in the affective state indicating that self-related belief updating might be  
212 motivated by the wish to uphold or even recover a positive affective state. This is in line with the idea

213 of motivated cognition, i.e. the assumption that cognitive processes like attention, information  
214 processing and decision making are not neutral on their own, but are always shaped by needs, feelings  
215 and desires of the individual<sup>56</sup>. Especially when processing information that challenges one's self-  
216 image, self-related belief updating is not only informed by the history of previous feedback, as it has  
217 often been assumed in classical reinforcement learning tasks, but also by various self-relevant needs  
218 and goals<sup>57</sup>. Transferred to the present study, this implies that the motivation to restore an endangered  
219 self-image and to regulate one's affect back to a set point directly impacts self-related information  
220 processing. The pattern of an active counter-regulation of negative affect by self-beneficial belief  
221 updating can be described as a striving for homeostasis<sup>11</sup>. To better capture the fluctuation of the  
222 affective state and its involvement in the trial-by-trial self-related belief updating loop, following the  
223 framework by Bromberg-Martin and Sharot<sup>15</sup>, future studies should consider repeated assessments of  
224 affective states during the task to predict the empowering potential of shifts in learning on the single  
225 trial level.

226 Since negative self-related beliefs are at the core of psychiatric conditions like depression<sup>47</sup>, this study  
227 targets clinically highly relevant processes. Depression is associated with seeking negative feedback  
228 which confirms negative self-related beliefs<sup>58</sup> and seeking negative feedback in combination with a  
229 stressful life event can even increase depressive symptoms<sup>59</sup>. Furthermore, depression is associated  
230 with a weaker stress recovery mediated by an attentional bias towards negative feedback.  
231 Understanding the mechanisms of how people form self-related beliefs in a context mimicking  
232 everyday performance settings and linking these to the regulation of negative affect after stress has  
233 important implications for understanding the etiology of depressive symptoms. The present study set-  
234 up, including a social-evaluative stress induction followed by a social-evaluative performance situation  
235 also addresses one of the fundamental fears of individuals with social anxiety: being devalued by  
236 others. Since both depression and social anxiety are associated with negatively biased updating  
237 behavior in response to self-related feedback<sup>12,21,48,60</sup>, we assume that the affect-regulating and  
238 empowering potential of self-beneficial belief updating after social-evaluative stress would be less

239 pronounced in depression or social anxiety and would thereby possibly exacerbate the  
240 symptomatology in a self-fulfilling way. Future studies with similar experimental set-ups and clinical  
241 samples could examine the relationship between self-beneficial belief updating and affect regulation  
242 in more detail and develop potential intervention strategies based on empowering individuals on their  
243 way to processing newly incoming information.

244 Replicating a previous study of ours<sup>21</sup>, self-related belief updating was negatively biased in the control  
245 condition in which participants were not exposed to any stress. In the prior study, this negativity bias  
246 has been shown to be specific for self-related belief updating in comparison to belief updating about  
247 another person<sup>21</sup>. In the present study, we found that after physical stress participants also exhibited  
248 a negativity bias in forming self-related beliefs, i.e. participants tended to make greater updates in  
249 response to negative prediction errors in contrast to positive prediction errors. The negativity bias  
250 stands in contrast to other studies reporting a positivity or optimism bias in feedback-based learning  
251 e.g. when receiving feedback about the chance to encounter negative life events<sup>20,61</sup>, about one's  
252 intelligence<sup>17</sup> or about one's personality<sup>18,19</sup> (a review<sup>16</sup>). There are several possible explanations for  
253 the motivation behind the negativity bias in context of the LOOP task in contrast to the reported  
254 positivity biases of other studies which was, however, not the focus of the present study (for a  
255 discussion on the negativity bias see<sup>21</sup>). In order to test for the specificity of self-beneficial belief  
256 updating after social-evaluative stress, it would be interesting to test if this effect also accounts for  
257 experiments that typically yield a positivity bias (e.g. for life events, IQ or personality) in feedback-  
258 based learning tasks.

259 Here, we demonstrated that both, negative affect and cortisol stress responses, go along with a shift  
260 in self-related belief updating. It has been shown before that experiencing social emotions (e.g.  
261 embarrassment or shame) is related to increased cortisol levels in situations which threaten one's  
262 social image, like the social-evaluative stress induction<sup>6</sup>. Cortisol has been linked to reward processing  
263 and feedback-based learning in the *stress triggers additional reward salience - STARS* - model which  
264 proposes that stress and the associated release of cortisol modulates the dopamine system, resulting

265 in an increased salience of rewards, thus biasing learning towards rewarding feedback<sup>36,64</sup>. The current  
266 results, however, suggest that the quality of stress (here, social vs. physical) might make a difference,  
267 and the *STARS* model, based on a rather unspecifically triggered cortisol response, cannot fully explain  
268 the present stress effect on self-related belief updating after social but not physical stress. While in  
269 our study both measured components of social-evaluative stress, negative affect and the cortisol stress  
270 response, were associated with shifts in learning behavior, we cannot rule out that our alteration of  
271 the Cold Pressor Test, to remove the social element of the conductor, potentially resulted in some  
272 participants terminating the test prematurely. This mode of testing might have been less intense and  
273 a more intense physical stress protocol might lead to similar effects on learning behavior. A more  
274 detailed recording of negative affect as well as the physiological stress response might help in future  
275 studies to better differentiate between different stress qualities and understand specific effects of  
276 social-evaluative stress.

277 To summarize, our results indicate a shift towards more self-beneficial belief updating after social-  
278 evaluative but not physical stress. This shift goes along with a better recovery from stress-induced  
279 negative affect. Linking self-related belief updating to affect is an important step in understanding  
280 biases in self-related learning and its relation to affect regulation. The special feature of the present  
281 study was the study-set that allowed to examine a link between negative affect and self-related belief  
282 updating. By introducing a performance context with consecutive self-related feedback, corresponding  
283 to real-life school or work related performance situations, individuals can form beliefs about their own  
284 abilities over time and potentially use this formation process as a means to regulate their affect. With  
285 this approach we aimed to increase the ecological validity of the study in order to trigger and  
286 investigate motivational processes that might be less relevant in more abstract study settings. Since  
287 social evaluation represents a constant stressor in every-day life, the question of an appropriate coping  
288 strategy to regulate negative affect is of great importance when handling everyday social situations.

289

290

291

## Materials and Methods

292

293

294

295

296

297

298

299

300

301

302

303

304

305

306

307

308

309

310

**Participants.** Eighty-nine participants recruited at the University of Lübeck Campus were included in the study. Upon appearance, participants were assigned to either a social-evaluative stress group (SOC;  $n = 29$ , 21 female, aged 18–28 years;  $M = 22.9$ ;  $SD = 2.76$ ), a physical stress group (PHY;  $n = 30$ , 20 female, aged 19–27 years;  $M = 22.5$ ;  $SD = 1.94$ ) or the control group (CON;  $n = 30$ , 20 female, aged 18–32 years;  $M = 22.3$ ;  $SD = 3.00$ , data of the control group were published before<sup>21</sup>). From the initially recruited  $N=96$  subjects, seven had to be excluded – five because they did not believe the cover story and two due to technical problems. All included participants were fluent in German, non-smokers with a body-mass index between 18.5 and 30. They were not diagnosed with acute or chronic psychiatric conditions or diseases affecting the hormone system and did not take psychiatric drugs or medication affecting the hormone system (except hormonal contraceptives). Participants had normal or corrected-to-normal vision and did not study psychology to avoid previous experience with experiments using cover stories. Additional exclusion criteria for participants who underwent the physical stress protocol were cardiovascular diseases, frequent fainting or seizures and current hand injuries. For more details on the sample characteristics see Supplementary Table S8a. All participants gave written informed consent prior to the participation and received monetary compensation for their participation. They were naive to the background of the study during the session and debriefed about the cover story afterwards. The study was conducted in compliance with the ethical guidelines of the American Psychological Association (APA) and was approved by the ethics committee of the University of Lübeck.

311

312

313

314

315

316

**Manipulation procedure. Social-evaluative stress.** Social-evaluative stress was induced by a public speech similarly to the Trier Social Stress Test<sup>3</sup>. Participants were instructed to prepare a short self-presentation for an application for a scholarship, which had to be presented in front of a selection committee who would allegedly assess the participant’s verbal skills and body language. The selection committee consisted of the experimenter, who was passive during the speech, a second experimenter, who was allegedly responsible for measuring verbal skills, and a passive camera assistant, who

317 pretended to videotape the speech. Before starting the ten-minute preparation period, participants  
318 briefly visited the room with the selection committee. After the preparation time was over,  
319 participants were asked to come back to this room and present their speech. Talking time was five  
320 minutes ( $M = 4.9$  min,  $SD = 0.16$ ) with a minimum of three minutes of uninterrupted speech. If the  
321 participant finished the speech before the time was over, the second experimenter waited for at least  
322 15 seconds with a motionless face and then asked the participant to continue. If the participant  
323 stopped speaking again and the three minutes of free speech had passed, the second experimenter  
324 asked standardized questions until the five minutes of talking time were over (“Explain why it is  
325 important for you to achieve a good performance.”, “Do you think it is important to improve yourself  
326 throughout your life?”, “Do you consider yourself a person who values his/her independence?”).  
327 Average social-evaluative stress duration (start subsequent rest period – start speech preparation) was  
328  $M = 16.4$  min,  $SD = 1.2$ .

329 *Physical stress.* Physical stress was induced by an exposure to ice water according to the Cold Pressor  
330 Test protocol<sup>50,65</sup>. Participants were asked to dip their non-dominant hand in cold water (water  
331 temperature  $3 - 5.5^{\circ}\text{C} = 37.4 - 41.9^{\circ}\text{F}$ ,  $M = 4.26^{\circ}\text{C}$ ,  $SD = 0.50$ ) for as long as possible up to three minutes  
332 (duration 48 sec – 3 min,  $M = 2.7$  min,  $SD = 0.7$ ). The water was kept in motion with a small electrical  
333 pump to prevent the water temperature from rising around the participant’s hand. To control for the  
334 procedure of the social-evaluative stress condition, participants visited the room with the cold pressor  
335 apparatus first, had a ten-minute preparation period and came back into the room for the stress  
336 exposure. During the preparation time, participants were asked to imagine dipping their hands in a  
337 freezing cold environment and write down their associations. To make the stress exposure less social,  
338 the experimenter was not present in the room but waited in an adjacent room. If the participant took  
339 out their hand before the three minutes were over, they had to signal this immediately by ringing a  
340 bell. The experimenter could roughly observe the participant in the reflection of the glass door, thus  
341 ensuring that she/he dipped the hand into the water. Average physical stress duration (including  
342 preparation period) was  $M = 16.2$  min,  $SD = 1.5$ .

343 *No stress control condition.* In the control condition, participants performed a reading task that was  
344 described to them as measuring reading speed. They had ten minutes to rehearse two different texts  
345 about applying for a scholarship. Afterwards, they were guided to the other room with nobody present  
346 and were asked to measure their reading time, while reading the two texts aloud at a natural speed.  
347 Average control duration was  $M = 15.3$  min,  $SD = 1.3$ .

348 **Manipulation checks.** *Cortisol.* Three saliva samples were collected during the experiment for cortisol  
349 analysis (see Fig. 1a). The first sample (baseline  $T_{1CORT}$ ) was taken after a 10 min period of rest  
350 immediately before starting the instruction for the stress manipulation (mean time between  $T_{1CORT}$   
351 and start of the SOC, PHY or CON preparation phase:  $M = 3.7$  min,  $SD = 1.4$ ). The post-stress cortisol  
352 sample  $T_{2CORT}$  was collected after another 10 minutes resting period following the stress manipulation  
353 and the last sample ( $T_{3CORT}$ ) was collected after the learning task ( $M = 45.6$  min ( $SD = 3.3$ ) post stress).  
354 The stress-induced cortisol change ( $\Delta CORT$ ) was determined by subtracting the cortisol levels of  $T_{2CORT}$   
355 -  $T_{1CORT}$ . Saliva was collected with Salivettes (Sarstedt, Nümbrecht, Germany), stored at  $-30$  °C and sent  
356 to the bio-psychological lab at TU Dresden, Dresden, Germany for analysis (here stored at  $-20$  °C until  
357 analysis). Salivary free cortisol levels were determined using a chemoluminescence immunoassay (IBL  
358 International, Hamburg, Germany).

359 *Negative affect.* We assessed negative affect by means of a short pen and paper questionnaire,  
360 covering the emotions embarrassment, anger, frustration, as well as the perceived stress with one  
361 rating each. The questionnaires were handed out at baseline ( $T_{1AFF}$ ) as well as at the very end of the  
362 experiment ( $T_{3AFF}$ ). The post-stress negative affect was measured immediately after the stress  
363 manipulation ( $T_{2AFF}$ ; see Fig. 1). Ratings were averaged for each measurement point to get a composite  
364 measure of negative affect (see Supplementary Fig. S2 for separate scores). The change in negative  
365 affect after stress ( $\Delta AFF$ ) was determined by subtracting  $T_1$  negative affect from  $T_2$  ( $T_{2AFF} - T_{1AFF}$ ). The  
366 recovery from negative affect (REC) was determined by subtracting  $T_3$  negative affect from  $T_2$  ( $T_{2AFF} -$   
367  $T_{3AFF}$ ).

368 **Behavioral task.** *Learning of own performance task.* The Learning of own performance (LOOP) task<sup>21</sup>  
369 (Fig. 1b) allows to measure self-related belief updating through trial-by-trial performance expectation  
370 ratings and subsequent performance feedback. The task included estimation questions in two different  
371 estimation categories (heights of houses and weights of animals) and was presented to the participants  
372 as a measure of estimation abilities. To make participants learn about their estimation ability the two  
373 estimation categories were paired with manipulated performance feedback implying high ability for  
374 one category and low ability for the other (e.g. heights of houses = high ability and weights of animals  
375 = low ability, estimation categories were counterbalanced between ability conditions). The assignment  
376 of the categories to the ability conditions was independent of the participants' actual performance and  
377 their performance expectation ratings. Thus, participants could learn over the course of the  
378 experiment that they were good in one estimation category and rather bad in the other one. Each trial  
379 began with a cue displaying the category of the next estimation question followed by a performance  
380 expectation rating for this question. Afterwards, the estimation question was presented together with  
381 a picture for ten seconds. Continuous response scales below the pictures determined a range of  
382 plausible answers for each question, and participants indicated their responses by navigating a pointer  
383 on the response scale with a computer mouse. Subsequently, feedback indicating the estimation  
384 accuracy as percentiles compared to an alleged reference group of 350 university students was  
385 presented for five seconds (e.g. "You are better than 72 % of the reference participants."). The order  
386 of the two estimation categories/ability conditions was intermixed with a maximum of two consecutive  
387 trials of the same condition and 30 trials per condition in total. The estimation questions were  
388 randomized within the estimation category/ability conditions. A fixed sequence of ability conditions  
389 and feedback was presented for all participants. In the low ability condition, feedback was  
390 approximately normally distributed around the 35th percentile ( $SD \approx 16$ ; range 1–60%) and in the high  
391 ability condition around the 65th percentile ( $SD \approx 16$ ; range 40–99%). The task started with detailed  
392 instructions and three test trials. All stimuli were presented using MATLAB Release 2015b (The  
393 MathWorks, Inc.) and the Psychophysics Toolbox<sup>66</sup>.



394 **Procedure.** To minimize noise in the cortisol saliva samples, participants were asked to follow  
395 behavioral rules prior to the experimental session. These were in detail: no alcohol on the evening  
396 before the experiment and bed rest at about 10 p.m. (ideal case eight hours of sleep); one hour before  
397 the session: no sport, no smoking, no drinks containing caffeine or theine, no food (including bonbons  
398 and chewing gums) and no juices. Upon arrival at the laboratory, participants read the participant  
399 information including the cover story regarding the stress manipulation and the LOOP task. After  
400 signing the consent form, they were asked to fill out a questionnaire checking the adherence to the  
401 behavioral rules. Participants rested for ten minutes before the baseline measurement, including saliva  
402 cortisol and negative affect, was obtained ( $T_{1\text{AFF/CORT}}$ ). During the resting period, they filled out a short  
403 personality questionnaire (not included in this study). Subsequently, participants of the social and  
404 physical stress groups were challenged with a stress protocol while participants of the control group  
405 did the control reading task. Directly afterwards, participants rated their affective state ( $T_{2\text{AFF}}$ ) followed  
406 by another ten minutes resting period, which was terminated with a saliva sampling ( $T_{2\text{CORT}}$ ). In the  
407 second part of the experiment participants performed the LOOP task. Finally, another cortisol sample  
408 and affective ratings were collected ( $T_{3\text{AFF/CORT}}$ ). After completing a post-experimental interview,  
409 including additional questionnaires, participants were debriefed about the cover story. The  
410 experimental sessions were run between 10.00 a.m. - 12.00 p.m., 1.00 - 3.00 p.m. or 3.45 - 5.45 p.m.  
411 The allocation to the time slots did not differ between the experimental groups (Pearson's Chi-squared  
412 test  $p = .867$ , see Supplementary Table S8b). See Fig. 1a for a graphical illustration of the procedure.

413 **Statistical analysis. Stress manipulation.** To test whether the stress manipulation was effective, the  
414 stress-induced changes in cortisol as well as affect were compared between the three experimental  
415 groups. Due to the stress manipulation, the variance of the cortisol and negative affect responses were  
416 unequal between the three experimental groups (Levene test  $ps < .05$ ). Since the distributions of the  
417 cortisol and affective stress response were skewed in some groups (Lilliefors-corrected Kolmogorov-  
418 Smirnov normality test  $ps < .05$ ) non-parametric tests were used. Negative affect responses were  
419 compared with the Kruskal-Wallis test, the cortisol response was compared with the Scheirer-Ray-Hare

420 test, an extension of the Kruskal–Wallis test, to control for time of the day (morning vs. noon vs.  
421 afternoon, see Procedure). Post-hoc comparisons between the groups were performed with Dunn’s  
422 test.

423 *Model free analysis of performance expectation ratings.* The analysis of the expectation ratings  
424 including computational modeling was adapted from Müller-Pinzler et al.<sup>21</sup>. To illustrate basic effects  
425 of the expectation ratings, a linear mixed model with the factors Ability condition (high ability vs. low  
426 ability), the continuous variable Trial (30 Trials), and Stress group (with the two contrasts SOC vs. [PHY,  
427 CON] and PHY vs. CON) as a between subject factor was performed.

428 *Computational modeling of learning behavior.* The dynamic changes in self-related beliefs, which were  
429 measured by the performance expectation ratings in response to the provided performance feedback,  
430 were modeled using prediction error delta-rule update equations (adapted from Rescorla-Wagner  
431 model<sup>51</sup>). There were three main models of the model space with one or two learning rates modeled  
432 separately for each participant (see Fig. 4). The first model (Unity Model) included a single learning  
433 rate for the whole time course ( $EXP_{t+1} = EXP_t + \alpha_{Uni} PE_t$ ). The second model (Ability Model) contained  
434 two separate learning rates for the two ability conditions allowing to capture a difference in  
435 expectation updating when receiving feedback in a high ability context ( $\alpha_{High\ ability}$ ) or low ability context  
436 ( $\alpha_{Low\ ability}$ ). The third model (Valence Model) with two separate learning rates for positive PEs ( $\alpha_{PE+}$ ) and  
437 negative PEs ( $\alpha_{PE-}$ ) across ability conditions allows to model learning that differs depending on the  
438 valence of prediction errors rather than different ability conditions. The three models were compared  
439 to a Mean Model with two performance expectations means reflecting the assumption of stable  
440 expectations for each ability condition without learning over time. In addition to the learning rates, we  
441 fitted two parameters for the initial belief about participant’s performance, separately for both ability  
442 conditions (see Table 1).

443 *Model fitting.* For model fitting we used the RStan package<sup>67</sup>, which uses Markov chain Monte Carlo  
444 (MCMC) sampling algorithms. All learning models of the model space were fitted separately for each  
445 subject. To sample posterior parameter distributions, a total of 2400 samples were drawn after 1000

446 burn-in samples (overall 3400 samples; thinned with a factor of 3) in three MCMC chains. Convergence  
447 of the MCMC chains to the target distributions was assessed by  $\hat{R}$  values<sup>68</sup> for all model parameters.  
448 One subject was excluded due to implausible model parameters, i.e. mean learning rate of almost 1,  
449 as well as  $\hat{R}$  values of 1.1 and low effective sample sizes ( $n_{eff}$ , estimates of the effective number of  
450 independent draws from the posterior distribution) for some model parameters of the valence model.  
451 Otherwise the effective sample sizes were greater than 1000 (>1400 for most parameters). Posterior  
452 distributions for all parameters for each of the participants were summarized by their mean resulting  
453 in a single parameter value per subject that we used to calculate group statistics.

454 *Bayesian model selection and family inference.* To select the model that describes the participants'  
455 updating behavior best, we estimated pointwise out-of-sample prediction accuracy for all fitted  
456 models separately for each participant by approximating leave-one-out cross-validation (LOO)<sup>69</sup>. To  
457 this end, we applied Pareto-smoothed importance sampling (PSIS) using the log-likelihood calculated  
458 from the posterior simulations of the parameter values as implemented by Vehtari et al.<sup>69</sup> (loo R  
459 package<sup>70</sup>). Sum PSIS-LOO scores for each model as well as information about  $\hat{k}$  values, the estimated  
460 shape parameters of the generalized Pareto distribution, indicating the reliability of the PSIS-LOO  
461 estimate, are depicted in Table 1. As summarized in Table 1 very few trials resulted in insufficient  
462 parameter values for  $\hat{k}$  and thus potentially unreliable PSIS-LOO scores (on average 0.20 % of trials per  
463 subject with  $\hat{k} > 0.7$ ). Bayesian model selection on PSIS-LOO scores was performed on the group level  
464 accounting for group heterogeneity as described by *Stephan et al.*<sup>52,71</sup>. This procedure provides the  
465 protected exceedance probability for each model ( $pxp$ ), indicating how likely a given model has a  
466 higher probability explaining the data than all other models, as well as the Bayesian omnibus risk ( $BOR$ ),  
467 the posterior probability that model frequencies for all models are all equal to each other<sup>71</sup>.  
468 Additionally, difference scores of PSIS-LOO for all models in contrast to the winning model were  
469 computed, which can be interpreted as a simple 'fixed-effect' model comparison<sup>69</sup> (see Table 1).

470 *Posterior predictive checks.* To test whether the predicted values of the winning model could capture  
471 the variance in the performance expectation ratings a regression analysis ( $EXP \sim \text{pred. values}$ ) was

472 performed for each subject separately for the two ability conditions. R-squared statistic was  
473 determined and averaged. In addition, the model free analysis of the expectation ratings was repeated  
474 with the predicted values of the winning model to assess if the predicted data captured the effects  
475 that were present in the data of the expectation ratings.

476 *Analysis of learning parameters.* Learning rates for positive ( $\alpha_{PE+}$ ) and negative prediction errors ( $\alpha_{PE-}$ ,  
477 factor PE-Valence) were compared between the three groups in a linear mixed model with the factors  
478 PE-Valence and group (split into the contrasts SOC vs. [PHY, CON] and PHY vs. CON). Additional post-  
479 hoc tests for the PE-Valence within each stress group were performed with the Wilcoxon test. To test  
480 whether the variance in affective response and the cortisol response created by our stress  
481 manipulation is related to a bias in the updating behavior, we calculated a normalized learning rate  
482 valence bias score (valence bias score =  $(\alpha_{PE+} - \alpha_{PE-}) / (\alpha_{PE+} + \alpha_{PE-})$ )<sup>21,53,54</sup> and correlated it with negative  
483 affect and the cortisol response using Spearman correlations. In case of the cortisol response, partial  
484 correlations controlling for time of the day were calculated to take into account circadian fluctuations  
485 of cortisol levels. To test whether the learning bias is associated with the recovery from negative affect  
486 elicited by stress (change in affective ratings post-stress  $T2_{AFF}$  – post-learning  $T3_{AFF}$ ), a partial  
487 correlation of the valence bias score and recovery was computed, controlling for stress-induced  
488 negative affect to take into account regression to the mean. For the whole sample, this was done using  
489 a partial Spearman correlation, while for the subsample of the social-evaluative stress group a partial  
490 Pearson correlation was computed. Data was analyzed in with the software R version 3.6.0<sup>72</sup>.

491

492

493

## References

- 494 1. Baumeister, R. F. & Leary, M. R. The need to belong: Desire for interpersonal attachments as a  
495 fundamental human motivation. *Psychol. Bull.* **117**, 497–529 (1995).
- 496 2. Rohleder, N., Beulen, S. E., Chen, E., Wolf, J. M. & Kirschbaum, C. Stress on the dance floor:  
497 the cortisol stress response to social-evaluative threat in competitive ballroom dancers.  
498 *Personal. Soc. Psychol. Bull.* **33**, 69–84 (2007).
- 499 3. Kirschbaum, C., Pirke, K.-M. & Hellhammer, D. H. The ‘Trier Social Stress Test’ – A tool for  
500 investigating psychobiological stress responses in a laboratory setting. *Neuropsychobiology*  
501 **28**, 76–81 (1993).
- 502 4. Burke, P. J. Identity processes and social stress. *Am. Sociol. Rev.* **56**, 836–849 (1991).
- 503 5. Joëls, M. & Baram, T. Z. The neuro-symphony of stress. *Nat. Rev. Neurosci.* **10**, 459–466  
504 (2009).
- 505 6. Gruenewald, T. L., Kemeny, M. E., Aziz, N. & Fahey, J. L. Acute threat to the social self: Shame,  
506 social self-esteem, and cortisol activity. *Psychosom. Med.* **66**, 915–924 (2004).
- 507 7. Campbell, J. & Ehlert, U. Acute psychosocial stress: Does the emotional stress response  
508 correspond with physiological responses? *Psychoneuroendocrinology* **37**, 1111–1134 (2012).
- 509 8. Müller-Pinzler, L. *et al.* Neural pathways of embarrassment and their modulation by social  
510 anxiety. *Neuroimage* **119**, 252–261 (2015).
- 511 9. Markus, H. R. & Wurf, E. The dynamic self-concept: A social psychological perspective. *Annu.*  
512 *Rev. Psychol.* **38**, 299–337 (1987).
- 513 10. Eisenberger, N. I., Inagaki, T. K., Muscatell, K. a, Byrne Haltom, K. E. & Leary, M. R. The neural  
514 sociometer: brain mechanisms underlying state self-esteem. *J. Cogn. Neurosci.* **23**, 3448–3455  
515 (2011).

- 516 11. Roese, N. J. & Olson, J. M. Better, stronger, faster: Self-serving judgment, affect regulation,  
517 and the optimal vigilance hypothesis. *Perspect. Psychol. Sci.* **2**, 124–141 (2007).
- 518 12. Gotlib, I. H. & Krasnoperova, E. Biased information processing as a vulnerability factor for  
519 depression. *Behav. Ther.* **29**, 603–617 (1998).
- 520 13. Kessler, R. C., Price, R. H. & Wortman, C. B. Social factors in psychopathology: stress, social  
521 support, and coping processes. *Annu. Rev. Psychol.* **36**, 531–572 (1985).
- 522 14. Gloria, C. T. & Steinhardt, M. A. Relationships among positive emotions, coping, resilience and  
523 mental health. *Stress Heal.* **32**, 145–156 (2016).
- 524 15. Bromberg-Martin, E. S. & Sharot, T. The value of beliefs. *Neuron* **106**, 561–565 (2020).
- 525 16. Sharot, T. & Garrett, N. Forming beliefs: Why valence matters. *Trends Cogn. Sci.* **20**, 25–33  
526 (2016).
- 527 17. Mobius, M., Niederle, M., Niehaus, P. & Rosenblat, T. *Managing self-confidence: theory and*  
528 *experimental evidence*. (2011). doi:10.3386/w17014
- 529 18. Eil, D. & Rao, J. M. The good news-bad news effect: asymmetric processing of objective  
530 information about yourself. *Am. Econ. Journal-Microeconomics* **3**, 114–138 (2011).
- 531 19. Korn, C. W., Prehn, K., Park, S. Q., Walter, H. & Heekeren, H. R. Positively biased processing of  
532 self-relevant social feedback. *J. Neurosci.* **32**, 16832–16844 (2012).
- 533 20. Sharot, T., Korn, C. W. & Dolan, R. J. How unrealistic optimism is maintained in the face of  
534 reality. *Nat. Neurosci.* **14**, 1475–1479 (2011).
- 535 21. Müller-Pinzler, L. *et al.* Negativity-bias in forming beliefs about own abilities. *Sci. Rep.* **9**, 14416  
536 (2019).
- 537 22. Ertac, S. Does self-relevance affect information processing? Experimental evidence on the  
538 response to performance and non-performance feedback. *J. Econ. Behav. Organ.* **80**, 532–545

- 539 (2011).
- 540 23. Watabe-Uchida, M., Eshel, N. & Uchida, N. Neural circuitry of reward prediction error. *Annu.*  
541 *Rev. Neurosci.* **40**, 373–394 (2017).
- 542 24. Glimcher, P. W. Understanding dopamine and reinforcement learning: The dopamine reward  
543 prediction error hypothesis. *Proc. Natl. Acad. Sci.* **108**, 15647–15654 (2011).
- 544 25. Schultz, W., Dayan, P. & Montague, P. R. A neural substrate of prediction and reward. *Science.*  
545 **275**, 1593–1599 (1997).
- 546 26. Adler, C. M. *et al.* Effects of acute metabolic stress on striatal dopamine release in healthy  
547 volunteers. *Neuropsychopharmacology* **22**, 545–550 (2000).
- 548 27. Payer, D. *et al.* Corticotropin-releasing hormone and dopamine release in healthy individuals.  
549 *Psychoneuroendocrinology* **76**, 192–196 (2017).
- 550 28. Holly, E. N. & Miczek, K. A. Ventral tegmental area dopamine revisited: effects of acute and  
551 repeated stress. *Psychopharmacology.* **233**, 163–186 (2016).
- 552 29. Schwabe, L., Joëls, M., Roozendaal, B., Wolf, O. T. & Oitzl, M. S. Stress effects on memory: An  
553 update and integration. *Neurosci. Biobehav. Rev.* **36**, 1740–1749 (2012).
- 554 30. van Leeuwen, J. M. C. *et al.* Reward-related striatal responses following stress in healthy  
555 individuals and patients with bipolar disorder. *Biol. Psychiatry Cogn. Neurosci. Neuroimaging*  
556 **4**, 966–974 (2019).
- 557 31. Bogdan, R. & Pizzagalli, D. A. Acute stress reduces reward responsiveness: implications for  
558 depression. *Biol. Psychiatry* **60**, 1147–54 (2006).
- 559 32. Porcelli, A. J., Lewis, A. H. & Delgado, M. R. Acute stress influences neural circuits of reward  
560 processing. *Front. Neurosci.* **6**, 157 (2012).
- 561 33. Kumar, P. *et al.* Differential effects of acute stress on anticipatory and consummatory phases

- 562 of reward processing. *Neuroscience* **266**, 1–12 (2014).
- 563 34. Robinson, O. J., Overstreet, C., Charney, D. R., Vytal, K. & Grillon, C. Stress increases aversive  
564 prediction error signal in the ventral striatum. *Proc. Natl. Acad. Sci. U. S. A.* **110**, 4129–33  
565 (2013).
- 566 35. Garrett, N., González-Garzón, A. M., Foulkes, L., Levita, L. & Sharot, T. Updating beliefs under  
567 perceived threat. *J. Neurosci.* **38**, 7901–7911 (2018).
- 568 36. Lighthall, N. R., Gorlick, M. A., Schoeke, A., Frank, M. J. & Mather, M. Stress modulates  
569 reinforcement learning in younger and older adults. *Psychol. Aging* **28**, 35–46 (2013).
- 570 37. Petzold, A., Plessow, F., Goschke, T. & Kirschbaum, C. Stress reduces use of negative feedback  
571 in a feedback-based learning task. *Behav. Neurosci.* **124**, 248–255 (2010).
- 572 38. van Leeuwen, J. M. C. *et al.* Increased responses of the reward circuitry to positive task  
573 feedback following acute stress in healthy controls but not in siblings of schizophrenia  
574 patients. *Neuroimage* **184**, 547–554 (2019).
- 575 39. Nikolova, Y. S., Bogdan, R., Brigidi, B. D. & Hariri, A. R. Ventral striatum reactivity to reward  
576 and recent life stress interact to predict positive affect. *Biol. Psychiatry* **72**, 157–163 (2012).
- 577 40. Lazarus, R. S. & Folkman, S. *Stress, appraisal, and coping*. (Springer Publishing Company,  
578 1984).
- 579 41. Thoits, P. A. Stress, coping, and social support processes: where are we? What next? *J. Health*  
580 *Soc. Behav. Spec No*, 53–79 (1995).
- 581 42. Glanz, K. & Schwartz, M. D. Stress, coping, and health behavior. in *Health Behavior and Health*  
582 *Education* 211–236 (Jossey-Bass, 2008).
- 583 43. vanDellen, M. R., Campbell, W. K., Hoyle, R. H. & Bradfield, E. K. Compensating, resisting, and  
584 breaking: A meta-analytic examination of reactions to self-esteem threat. *Personal. Soc.*  
585 *Psychol. Rev.* **15**, 51–74 (2011).



- 586 44. Jundt, D. K. & Hinsz, V. B. Influences of positive and negative affect on decisions involving  
587 judgmental biases. *Soc. Behav. Pers.* **30**, 45–52 (2002).
- 588 45. Sharot, T. The optimism bias. *Curr. Biol.* **21**, R941–R945 (2011).
- 589 46. Taylor, S. E. & Brown, J. D. Illusion and well-being: a social psychological perspective on  
590 mental health. *Psychol. Bull.* **103**, 193–210 (1988).
- 591 47. Beck, A. T. Cognitive models of depression. in *Clinical Advances in Cognitive Psychotherapy:  
592 Theory and Application* (eds. Leahy, R. L. & Dowd, E. T.) 29–61 (Springer Publisher Company,  
593 2002).
- 594 48. Korn, C. W., Sharot, T., Walter, H., Heekeren, H. R. & Dolan, R. J. Depression is related to an  
595 absence of optimistically biased belief updating about future life events. *Psychol. Med.* **44**,  
596 579–592 (2014).
- 597 49. Greenberg, J., Pyszczynski, T., Burling, J. & Tibbs, K. Depression, self-focused attention, and  
598 the self-serving attributional bias. *Pers. Individ. Dif.* **13**, 959–965 (1992).
- 599 50. Hines, E. A. & Brown, G. E. A standard test for measuring the variability of blood pressure: its  
600 significance as an index of the prehypertensive state. *Ann. Intern. Med.* **7**, 209–217 (1933).
- 601 51. Rescorla, R. A. & Wagner, A. R. A theory of Pavlovian conditioning: variations in the  
602 effectiveness of reinforcement and non reinforcement. in *Classical conditioning II: current  
603 research and theory* (eds. Black, A. & Prokasy, W. F.) 64–99 (Appleton-Century-Crofts, 1972).
- 604 52. Stephan, K. E., Penny, W. D., Daunizeau, J., Moran, R. J. & Friston, K. J. Bayesian model  
605 selection for group studies. *Neuroimage* **46**, 1004–1017 (2009).
- 606 53. Niv, Y., Edlund, J. A., Dayan, P. & O’Doherty, J. P. Neural prediction errors reveal a risk-  
607 sensitive reinforcement-learning process in the human brain. *J. Neurosci.* **32**, 551–562 (2012).
- 608 54. Palminteri, S., Lefebvre, G., Kilford, E. J. & Blakemore, S. J. Confirmation bias in human  
609 reinforcement learning: Evidence from counterfactual feedback processing. *PLoS Comput.*

- 610 *Biol.* **13**, e1005684 (2017).
- 611 55. Leary, M. R. Motivational and emotional aspects of the self. *Annu. Rev. Psychol.* **58**, 317–344  
612 (2007).
- 613 56. Hughes, B. L. & Zaki, J. The neuroscience of motivated cognition. *Trends Cogn. Sci.* **19**, 62–64  
614 (2015).
- 615 57. Kuzmanovic, B. & Rigoux, L. Valence-dependent belief updating: Computational validation.  
616 *Front. Psychol.* **8**, 1087 (2017).
- 617 58. Giesler, R. B., Josephs, R. A. & Swann, W. B. Self-verification in clinical depression: The desire  
618 for negative evaluation. *J. Abnorm. Psychol.* **105**, 358–368 (1996).
- 619 59. Pettit, J. & Joiner, T. E. Negative-feedback seeking leads to depressive symptom increases  
620 under conditions of stress. *J. Psychopathol. Behav. Assess.* **23**, 69–74 (2001).
- 621 60. Koban, L. *et al.* Social anxiety is characterized by biased learning about performance and the  
622 self. *Emotion* **17**, 1144–1155 (2017).
- 623 61. Kuzmanovic, B., Jefferson, A. & Vogeley, K. The role of the neural reward circuitry in self-  
624 referential optimistic belief updates. *Neuroimage* **133**, 151–162 (2016).
- 625 62. Sedikides, C. & Gregg, A. P. Self-enhancement: Food for thought. *Perspect. Psychol. Sci.* **3**,  
626 102–116 (2008).
- 627 63. Langer, E. J. The illusion of control. *J. Pers. Soc. Psychol.* **32**, 311–328 (1975).
- 628 64. Mather, M. & Lighthall, N. R. Both risk and reward are processed differently in decisions made  
629 under stress. *Curr. Dir. Psychol. Sci.* **21**, 36–41 (2012).
- 630 65. Hines, E. A. & Brown, G. E. A standard stimulus for measuring vasomotor reactions: its  
631 application in study of hypertension. *Proc. Staff Meet. Mayo Clin.* **7**, 332–335 (1932).
- 632 66. Brainard, D. H. The Psychophysics Toolbox. *Spat. Vis.* **10**, 433–6 (1997).

- 633 67. Stan Development Team (2019). “RStan: the R interface to Stan.” R package version 2.19.2,  
634 <http://mc-stan.org/>.
- 635 68. Gelman, A. & Rubin, D. B. Inference from iterative simulation using multiple sequences. *Stat.*  
636 *Sci.* **7**, 457–472 (1992).
- 637 69. Vehtari, A., Gelman, A. & Gabry, J. Practical Bayesian model evaluation using leave-one-out  
638 cross-validation and WAIC. *Stat. Comput.* **27**, 1413–1432 (2017).
- 639 70. Vehtari A, Gabry J, Magnusson M, Yao Y, Gelman A (2019). “loo: Efficient leave-one-out cross-  
640 validation and WAIC for Bayesian models.” R package version 2.1.0, <https://mc-stan.org/loo>.
- 641 71. Rigoux, L., Stephan, K. E., Friston, K. J. & Daunizeau, J. Bayesian model selection for group  
642 studies - revisited. *Neuroimage* **84**, 971–85 (2014).
- 643 72. R Core Team (2013). R: A language and environment for statistical computing. R Foundation for  
644 Statistical Computing, Vienna, Austria. URL <http://www.R-project.org/>.
- 645

646

## Figures

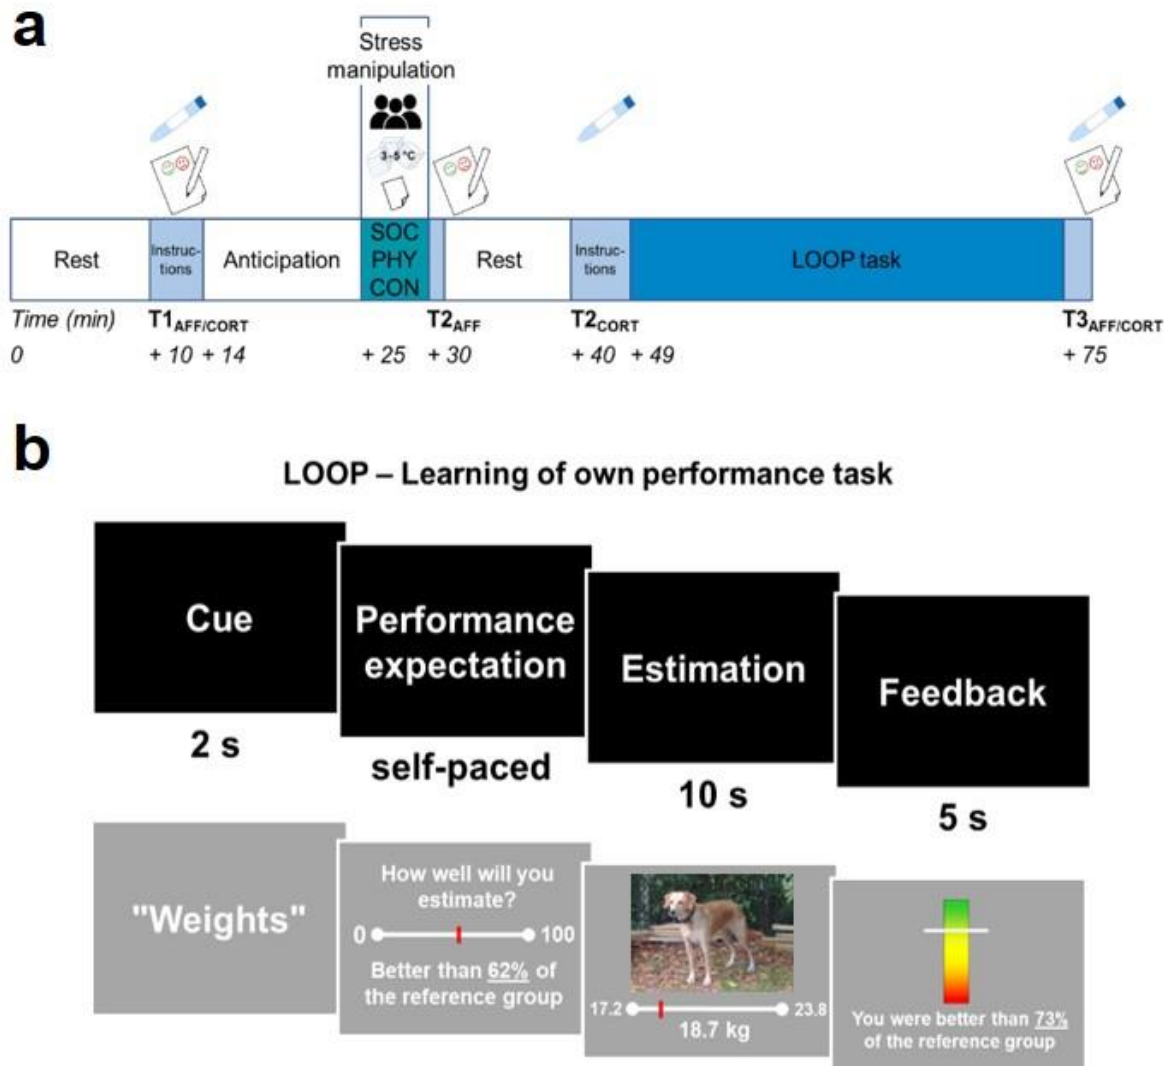

647

648 **Fig. 1. (a)** Experimental timeline and procedure. SOC: social-evaluative stress group (public speech  
649 [audience icon],  $n = 29$ ), PHY: physical stress group (Cold Pressor Test [ice cubes icon],  $n = 30$ ), CON:  
650 no stress control group (reading task [paper icon],  $n = 30$ ), salivette icon: saliva collection for cortisol  
651 determination; paper pencil icon: rating of negative affect including perceived stress, embarrassment,  
652 anger, and frustration. **(b)** Sequence of one trial. 1. Cue: display of the upcoming estimation category  
653 associated with a high or low ability condition, 2. Performance expectation rating, 3. Estimation  
654 question, 4. Performance feedback. Figure adapted from Müller-Pinzler et al.<sup>21</sup>.  
655

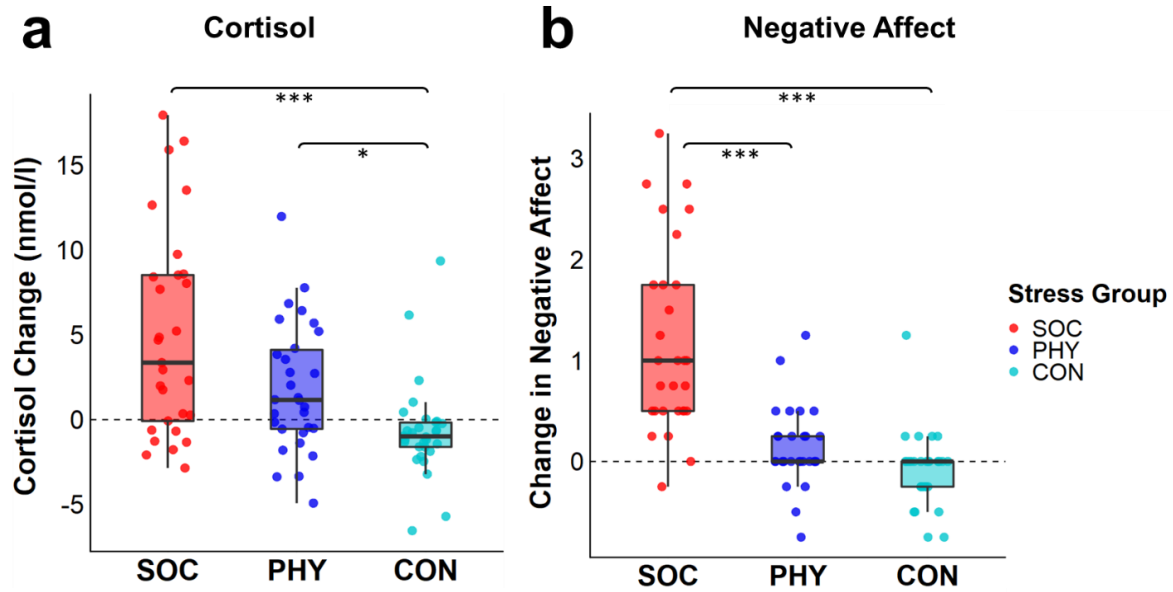

656

657 **Fig. 2. (a)** Change in saliva cortisol levels after stress induction (post-stress  $T_{2CORT}$  - baseline  $T_{1CORT}$ ),  
 658 **(b)** Change in negative affect (post-stress  $T_{2AFF}$  - baseline  $T_{1AFF}$ ), SOC = Social-evaluative stress group,  
 659 PHY = Physical stress group, CON = no stress control group. Line inside box: median, lower/upper box  
 660 hinges: 25<sup>th</sup> and 75<sup>th</sup> percentile, lower/upper box whiskers: smallest/largest value within 1.5 x inter-  
 661 quartile range from hinges, \* $p < .05$ , \*\*\* $p < .001$ .  
 662

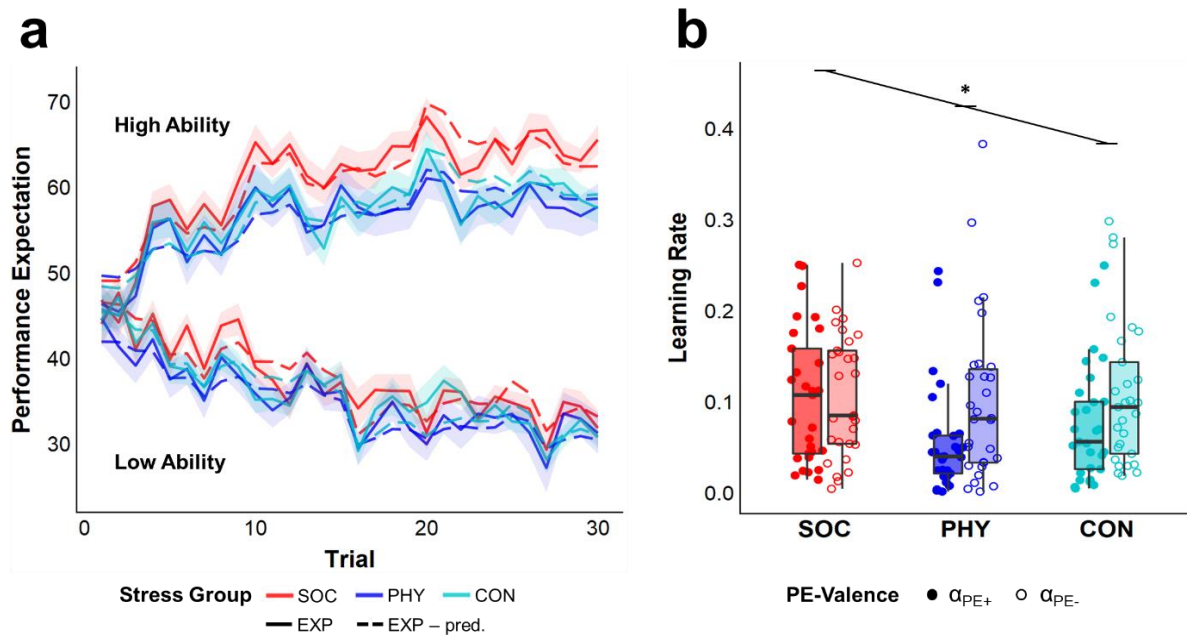

663

664 **Fig. 3. (a)** Performance expectation ratings (EXP, solid line) and performance expectations predicted  
 665 by the winning model (EXP - pred., dashed line) over the time course of 30 trials. Ratings and predicted  
 666 values were averaged across participants separately for the two ability conditions and the three  
 667 experimental groups. Shaded areas represent the standard errors of the expectation ratings for each  
 668 trial. **(b)** Learning rates derived from the Valence Model. A significant interaction effect (\*) of PE-  
 669 Valence x Stress group (SOC = social-evaluative stress, PHY = physical stress, CON = no stress control)  
 670 indicates that a bias towards increased updating in response to negative prediction errors ( $\alpha_{PE-}$ ) in  
 671 contrast to positive prediction errors ( $\alpha_{PE+}$ ) is absent in the social-evaluative stress group.

## Model space

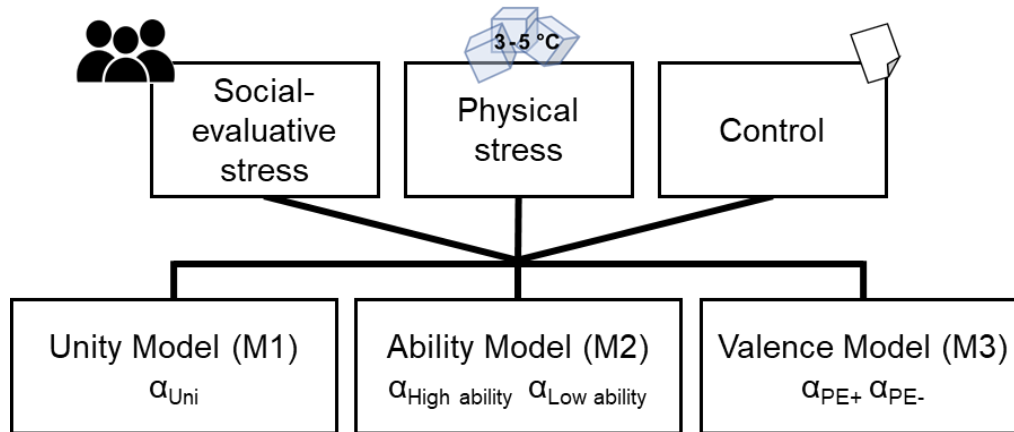

672

673 **Fig. 4.** Structure of the model space.  $\alpha_{Uni}$  = one learning rate for the whole time course;  $\alpha_{High\ ability}/\alpha_{Low}$   
 674  $ability$  = two separate learning rates for the two ability conditions;  $\alpha_{PE+}/\alpha_{PE-}$  = two separate learning rates  
 675 for positive and negative prediction errors; Figure adapted from Müller-Pinzler et al.<sup>21</sup>.

676

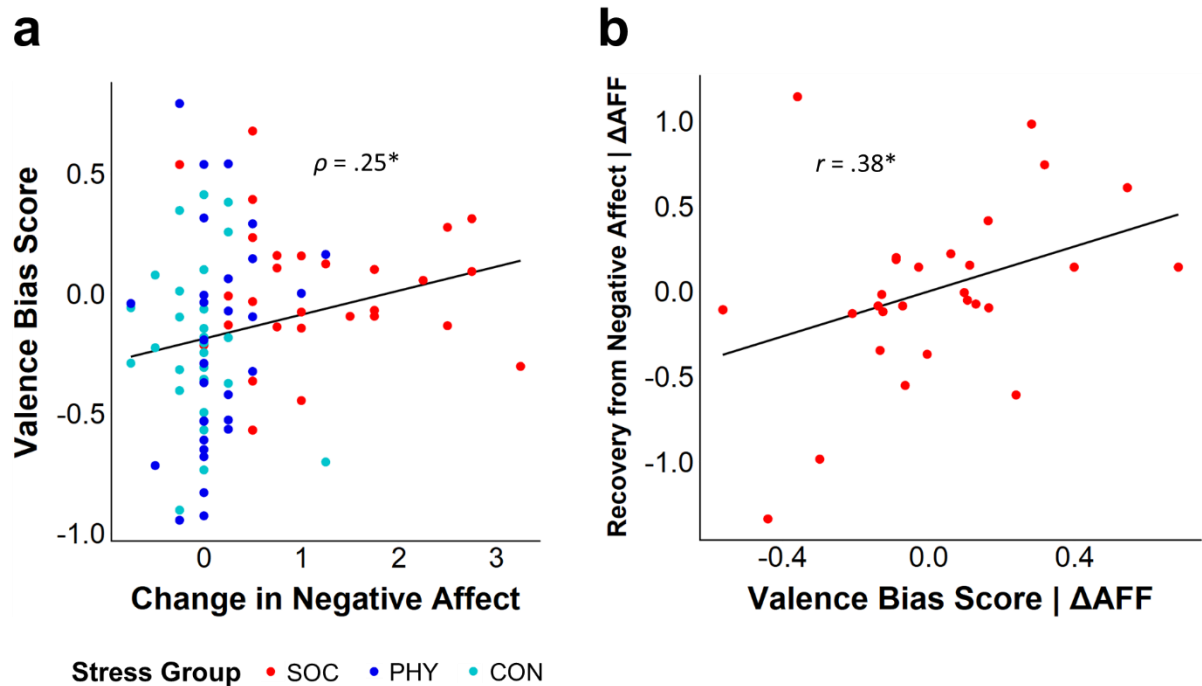

677

678 **Fig. 5. (a)** Correlation plot of valence bias score  $((\alpha_{PE+} - \alpha_{PE-})/(\alpha_{PE+} + \alpha_{PE-}))$  and stress-induced change in  
 679 negative affect (ratings  $T_{2AFF} - T_{1AFF}$ ). A stronger affective stress response was associated with more  
 680 self-beneficial belief updating (higher valence bias score) in the subsequent learning paradigm. Slope  
 681 of a linear regression model added for better visualization;  $\rho$  = Spearman's Rho. **(b)** Partial correlation  
 682 plot of valence bias score and recovery from negative affect (REC, ratings  $T_{2AFF} - T_{3AFF}$ ) in the subsample  
 683 of the social-evaluative stress group ( $n = 29$ ) controlled for the stress-induced change in negative affect  
 684 ( $\Delta AFF$ , ratings  $T_{2AFF} - T_{1AFF}$ ). More self-beneficial belief updating (higher valence bias score) is  
 685 associated with a better recovery from stress-induced negative affect. Slope fit with linear regression  
 686 model;  $r$  = Pearson's  $r$ ; \* =  $p < .05$ .

687

## Tables

Table 1. PSIS-LOO Scores for the whole sample

| Model              | PSIS-LOO | LOO-SE | LOO-Diff     | % of $\hat{k} > 0.7$ | No. Est.   |
|--------------------|----------|--------|--------------|----------------------|------------|
|                    |          |        | (SE-Diff)    |                      | Parameters |
| Unity Model (M1)   | -2028.5  | 257.0  | 267.1 (52.0) | 0.09                 | 3          |
| Ability Model (M2) | -1884.4  | 247.4  | 123.0 (95.9) | 0.53                 | 4          |
| Valence Model (M3) | -1761.4  | 280.4  |              | 0.17                 | 4          |
| Mean Model         | -2531.9  | 219.2  | 770.5 (93.5) | 0                    | 2          |

*Note.* LOO = sum PSIS-LOO, approximate leave-one-out cross-validation (LOO) using Pareto-smoothed importance sampling (PSIS); LOO-SE = Standard error of PSIS-LOO; LOO-Diff (SE-Diff) = Difference in expected predictive accuracy (PSIS-LOO) for all models from the model with the highest PSIS-LOO (Valence Model) and standard errors of differences; percentage of  $\hat{k}$  - estimated shape parameters of the generalized Pareto distribution - exceeding 0.7 (all according to Vehtari et al.<sup>69</sup>); No. Est. Parameters = number of estimated parameters in the model.

688
