# Supplementary material for: Self-beneficial belief updating as a coping mechanism for stress-induced negative affect
Source: bioRxiv or medRxiv preprint supplement (doi:10.1101/2020.12.02.408096), 2020-12-17
Supplement: Supplementary file [file media-1.pdf]

1 **Supplementary Information**

2

3 **Title:** Self-beneficial belief updating as a coping mechanism for stress-induced negative affect

4

5 **Authors:**

6 Nora Czekalla<sup>1</sup>, Janine Baumann<sup>1</sup>, David S. Stolz<sup>1</sup>, Annalina V. Mayer<sup>1</sup>, Johanna F. Voges<sup>1</sup>, Lena

7 Rademacher<sup>1</sup>, Frieder M. Paulus<sup>1</sup>, Sören Krach<sup>1</sup>, Laura Müller-Pinzler<sup>1</sup>

8

9 **Affiliations:**

10 <sup>1</sup>Social Neuroscience Lab at the Translational Psychiatry Unit (TPU), Department of Psychiatry and  
11 Psychotherapy, University of Lübeck, Ratzeburger Allee 160, D-23538 Lübeck, Germany

12

13 **\*Email addresses of corresponding authors:**

14 Nora Czekalla nora.czekalla@uni-luebeck.de

15 Laura Müller-Pinzler laura.mueller-pinzler@uni-luebeck.de

16

17 **\*Postal address of corresponding Authors:**

18 Nora Czekalla & Laura Müller-Pinzler

19 Department of Psychiatry and Psychotherapy,

20 Center of Brain, Behavior, and Metabolism (CBBM)

21 University of Lübeck, Ratzeburger Allee 160, D-23538 Lübeck, Germany

22 Phone: +49 451 3101 7510

23

24 **Supplementary Results**

25

26 **Cortisol response**

*Table S1. Cortisol response - Scheirer-Ray-Hare Test*

|                                | <i>Sum of Squares</i> | <i>df</i> | <i>H</i> | <i>p</i> |
|--------------------------------|-----------------------|-----------|----------|----------|
| Stress group                   | 12642                 | 2         | 18.939   | < .001   |
| Time of the day                | 6830                  | 2         | 10.232   | .006     |
| Stress group x Time of the day | 3640                  | 4         | 5.902    | .207     |
| Residuals                      | 35329                 | 80        |          |          |

*Note.* Group comparison of the stress-induced cortisol response (post-stress T2<sub>CORT</sub> - baseline T1); *df* = degrees of freedom; *H* = test statistic; factor Stress group: social-evaluative stress (n = 29) vs. physical stress (n = 30) vs. no stress (n = 30), factor time of the day: morning vs. noon vs. afternoon.

27

28

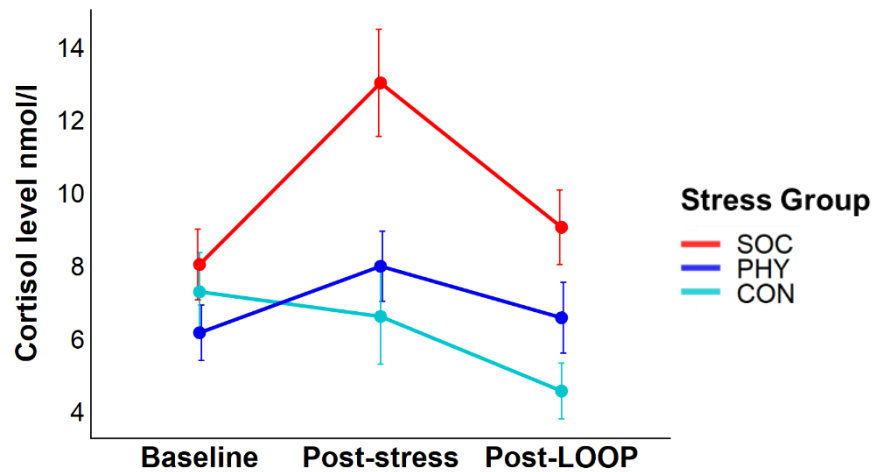

29

**Fig. S1.** Means and standard errors for the cortisol levels over the course of the experiment separately for the three stress groups (social-evaluative stress [n = 29] vs. physical stress [n = 30] vs. no stress [n = 30]); LOOP = Learning of own performance task.

30

31

32

33

34

35

36 **Negative affect ratings**

37

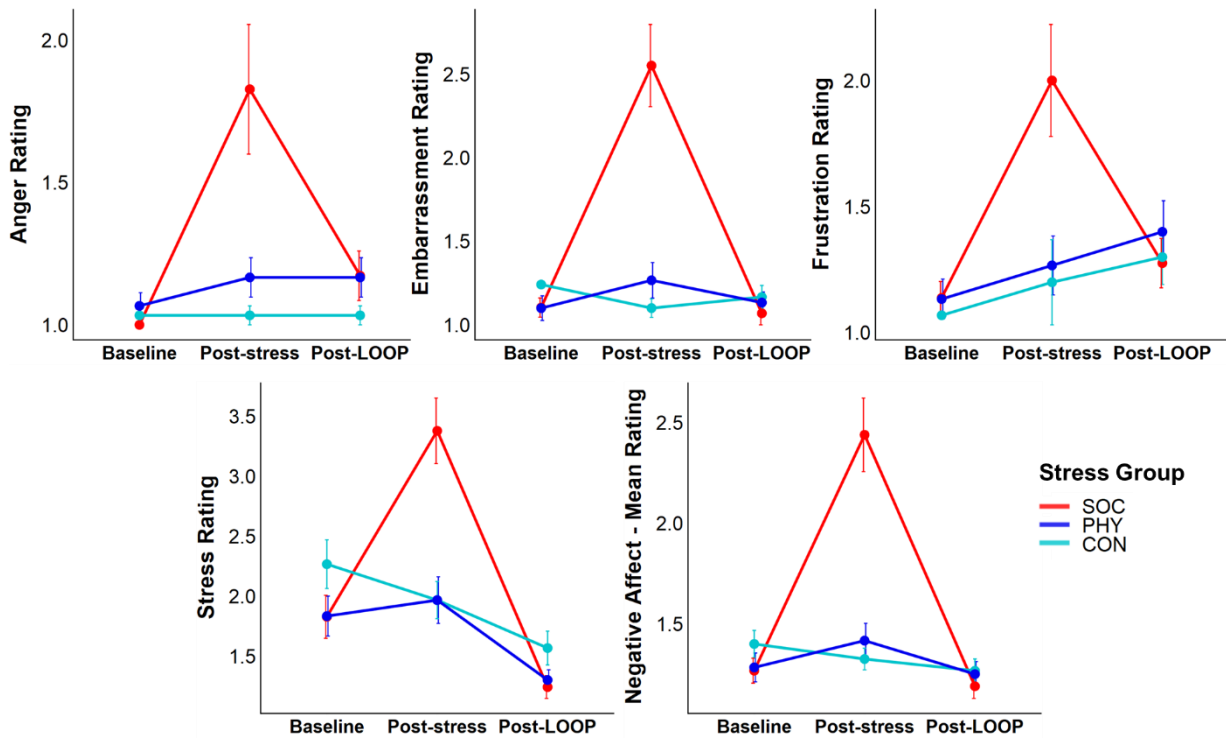

**Fig. S2.** Means and standard errors for the negative affect ratings separately for the three stress groups (SOC = social-evaluative stress [n = 29], PHY = physical stress [n = 30], CON = control [n = 30, embarrassment and frustration: n = 29 due to missing values]); LOOP = Learning of own performance task.

38 **Forming self-related beliefs over time - Model free behavior analysis**

*Table S2. Performance Expectation Ratings - Linear model*

|                                                  | <i>B [95 % CI]</i>      | <i>SE</i> | <i>df</i> | <i>t</i> | <i>p</i> |
|--------------------------------------------------|-------------------------|-----------|-----------|----------|----------|
| Intercept                                        | 42.33<br>[40.48; 44.19] | 0.95      | 5156      | 44.70    | < .001   |
| Ability condition                                | 9.59<br>[7.36; 11.83]   | 1.13      | 86        | 8.52     | <.001    |
| Ability condition *<br>SOC vs. [PHY,CON]         | -0.35<br>[-1.94; 1.24]  | 0.80      | 86        | -0.43    | .665     |
| Ability condition * PHY vs. CON                  | 0.79<br>[-1.93; 3.52]   | 1.37      | 86        | 0.58     | .564     |
| Trial                                            | -0.41<br>[-0.44; -0.37] | 0.02      | 5156      | -23.75   | < .001   |
| Trial * SOC vs. [PHY,CON]                        | -0.01<br>[-0.04; 0.01]  | 0.01      | 5156      | -0.96    | .3346    |
| Trial * PHY vs. CON                              | 0.02<br>[-0.02; 0.06]   | 0.02      | 5156      | 1.13     | .261     |
| Trial * Ability condition                        | 0.80<br>[0.75; 0.84]    | 0.02      | 5156      | 32.73    | < .001   |
| Trial * Ability condition *<br>SOC vs. [PHY,CON] | 0.07<br>[0.04; 0.10]    | 0.02      | 5156      | 4.01     | < .001   |
| Trial * Ability condition *<br>PHY vs. CON       | -0.06<br>[-0.12; -0.01] | 0.03      | 5156      | -2.15    | 0.031    |

Note. Linear mixed-effects model fit by maximum likelihood; dependent variable: performance expectation ratings; continuous variable: Trial, factor variables: Ability condition (high vs. low) and Stress group (SOC = social-evaluative stress [n = 29], PHY= physical stress [n = 30], CON = control [n = 30]) split in the contrasts SOC vs. [PHY,CON] and PHY vs. CON; *B* = unstandardized beta coefficient; *CI* = 95 % confidence interval; *SE* = standard error of *B*; *df* = degrees of freedom.

39

40

*Table S3. Model comparison*

| <i>Model</i>                    | <i>PSIS-LOO</i> | <i>LOO-SE</i> | <i>LOO-Diff<br/>(SE-Diff)</i> | <i>% of <math>\hat{k} &gt; 0.7</math></i> | <i>No. Est.<br/>Parameters</i> |
|---------------------------------|-----------------|---------------|-------------------------------|-------------------------------------------|--------------------------------|
| <b>Whole Sample</b>             |                 |               |                               |                                           |                                |
| Unity Model                     | -2028.5         | 257.0         | 267.1 (52.0)                  | 0.09                                      | 3                              |
| Ability Model                   | -1884.4         | 247.4         | 123.0 (95.9)                  | 0.53                                      | 4                              |
| Valence Model                   | -1761.4         | 280.4         |                               | 0.17                                      | 4                              |
| Mean Model                      | -2531.9         | 219.2         | 770.5 (93.5)                  | 0                                         | 2                              |
| <b>Social-evaluative Stress</b> |                 |               |                               |                                           |                                |
| Unity Model                     | -625.3          | 83.1          | 60.7 (21.4)                   | 0.17                                      | 3                              |
| Ability Model                   | -605.1          | 91.8          | 40.5 (16.4)                   | 0.8                                       | 4                              |
| Valence Model                   | -564.6          | 91.7          |                               | 0.29                                      | 4                              |
| Mean Model                      | -877.4          | 94.0          | 312.7 (40.3)                  | 0                                         | 2                              |
| <b>Physical Stress</b>          |                 |               |                               |                                           |                                |
| Unity Model                     | -840.1          | 225.7         | 107.6 (43.3)                  | 0                                         | 3                              |
| Ability Model                   | -782.9          | 208.8         | 50.5 (62.1)                   | 0.39                                      | 4                              |
| Valence Model                   | -732.5          | 247.5         |                               | 0.11                                      | 4                              |
| Mean Model                      | -905.5          | 181.1         | 173.1 (75.1)                  | 0                                         | 2                              |
| <b>Control</b>                  |                 |               |                               |                                           |                                |
| Unity Model                     | -563.1          | 92.2          | 98.7 (19.9)                   | 0.11                                      | 3                              |
| Ability Model                   | -496.4          | 96.8          | 32.1 (17.3)                   | 0.40                                      | 4                              |
| Valence Model                   | -464.3          | 98.3          |                               | 0.11                                      | 4                              |
| Mean Model                      | -749.0          | 84.6          | 284.7 (35.3)                  | 0                                         | 2                              |

*Note.* LOO = sum PSIS-LOO, approximate leave-one-out cross-validation (LOO) using Pareto-smoothed importance sampling (PSIS); LOO-SE = Standard error of PSIS-LOO; LOO-Diff (SE-Diff) = Difference in expected predictive accuracy (PSIS-LOO) for all models from the model with the highest PSIS-LOO (Valence Model) and standard errors of differences; percentage of  $\hat{k}$  - estimated shape parameters of the generalized Pareto distribution - exceeding 0.7 (all according to Vehtari et al.<sup>1</sup>); No. Est. Parameters = number of estimated parameters in the model; social-evaluative stress (n = 29), physical stress (n = 30), control (n = 29).

43 **Posterior predictive checks: Behavioral analyses on the predicted data.**

*Table S4. Predicted Performance Expectations - Linear model*

|                                                  | <i>B [95 % CI]</i>      | <i>SE</i> | <i>df</i> | <i>t</i> | <i>p</i> |
|--------------------------------------------------|-------------------------|-----------|-----------|----------|----------|
| Intercept                                        | 42.56<br>[40.80; 44.33] | 0.90      | 5098      | 47.13    | < .001   |
| Ability condition                                | 9.05<br>[7.01; 11.08]   | 1.03      | 85        | 8.82     | <.001    |
| Ability condition *<br>SOC vs. [PHY,CON]         | -0.03<br>[-2.92; 2.86]  | 1.45      | 85        | -0.02    | .983     |
| Ability condition * PHY vs. CON                  | 1.30<br>[-1.56; 4.17]   | 1.44      | 85        | 0.90     | .369     |
| Trial                                            | -0.42<br>[-0.44; -0.41] | 0.01      | 5098      | -49.37   | < .001   |
| Trial * SOC vs. [PHY,CON]                        | 0.00<br>[-0.02; 0.03]   | 0.01      | 5098      | 0.40     | .690     |
| Trial * PHY vs. CON                              | 0.03<br>[0.01; 0.06]    | 0.01      | 5098      | 2.83     | .005     |
| Trial * Ability condition                        | 0.84<br>[0.82; 0.87]    | 0.01      | 5098      | 69.66    | < .001   |
| Trial * Ability condition *<br>SOC vs. [PHY,CON] | 0.07<br>[0.03; 0.10]    | 0.02      | 5098      | 3.93     | < .001   |
| Trial * Ability condition *<br>PHY vs. CON       | -0.10<br>[-0.13; -0.07] | 0.02      | 5098      | -5.85    | < .001   |

Note. Linear mixed-effects model fit by maximum likelihood; dependent variable: performance expectations predicted by winning model; continuous variable: Trial, factor variables: Ability condition (high vs. low) and Stress group (SOC = social-evaluative stress [n = 29], PHY= physical stress [n = 30], CON = control [n = 29]) split in the contrasts SOC vs. [PHY,CON] and PHY vs. CON; *B* = unstandardized beta coefficient; *CI* = 95 % confidence interval; *SE* = standard error of *B*; *df* = degrees of freedom.

44

45

46

47

48 **Learning parameters.**

49 **Group comparison of learning rates**

*Table S5. Learning rates - Linear model*

|                                   | <i>B [95 % CI]</i>         | <i>SE</i> | <i>b</i> | <i>df</i> | <i>t</i> | <i>p</i> |
|-----------------------------------|----------------------------|-----------|----------|-----------|----------|----------|
| Intercept                         | 0.091<br>[0.079; 0.105]    | 0.007     |          | 85        | 13.412   | < 0.001  |
| PE-Valence                        | -0.013<br>[-0.020; -0.006] | 0.004     | -0.178   | 85        | -3.596   | .0005    |
| SOC vs. [PHY,CON]                 | 0.015<br>[-0.004; 0.034]   | 0.010     | 0.138    | 85        | 1.500    | .1373    |
| PHY vs. CON                       | -0.007<br>[-0.023; 0.010]  | 0.008     | -0.074   | 85        | -0.798   | .4272    |
| PE-Valence * SOC vs.<br>[PHY,CON] | 0.012<br>[0.002; 0.022]    | 0.005     | 0.114    | 85        | 2.303    | .0237    |
| PE-Valence * PHY vs. CON          | -0.003<br>[-0.012; 0.006]  | 0.004     | -0.036   | 85        | -0.724   | .4711    |

*Note.* Linear mixed-effects model fit by maximum likelihood; dependent variable: learning rates derived from the valence model; learning rates for positive and negative prediction errors (PE, within subject factor PE-Valence); Stress group (SOC = social-evaluative stress [n = 29], PHY= physical stress [n = 30], CON = control [n = 29]) split in the contrasts SOC vs. [PHY,CON] and PHY vs. CON; *B* = unstandardized beta coefficient; *CI* = 95 % confidence interval; *SE* = standard error of *B*; *b* = standardized beta coefficient; *df* = degrees of freedom.

50

51

52 **Associations of valence bias score with stress response.**

53 As was to be expected, both measured components of the stress response, i.e. change in negative  
 54 affect (AFF, post-stress T2<sub>AFF</sub> - baseline T1) and the cortisol response (CORT, post-stress T2<sub>CORT</sub> - baseline  
 55 T1) share common variance ( $\rho_{\text{AFF,CORT}} = .31, p = .003$ ). In order to test the effect of one component on  
 56 the valence bias score (BIAS,  $(\alpha_{\text{PE}+} - \alpha_{\text{PE}-}) / (\alpha_{\text{PE}+} + \alpha_{\text{PE}-})$ ) independently of the other, partial correlations  
 57 were calculated additionally. The change in negative affect could only trend wise predict a learning  
 58 bias independent of the cortisol response ( $\rho_{\text{BIAS,AFF|CORT}} = .18, p = .097$ ), the effect of the cortisol  
 59 response on the learning bias remained significant when controlling for the negative affect response  
 60 and time of the day (TIME,  $\rho_{\text{BIAS,CORT|AFF,TIME}} = .23, p = .035$ ). Within the subsamples of the three stress  
 61 groups all correlations between change in negative affect/ cortisol response and the valence bias score  
 62 are not significant (Table S7).

Table S6. Spearman correlations for change in negative affect and cortisol stress reaction with the valence bias score

|                           |        | Social Stress |                | Physical Stress |                | Control |                |
|---------------------------|--------|---------------|----------------|-----------------|----------------|---------|----------------|
|                           |        | AFF           | CORT  <br>TIME | AFF             | CORT  <br>TIME | AFF     | CORT  <br>TIME |
|                           | $\rho$ | .03           | .05            | .34             | .32            | -.09    | .18            |
| <b>Valence Bias Score</b> | $\rho$ | .865          | .807           | .063            | .092           | .660    | .360           |
|                           | $n$    | 29            | 29             | 30              | 30             | 29      | 29             |

Note. Valence bias score =  $(\alpha_{\text{PE}+} - \alpha_{\text{PE}-}) / (\alpha_{\text{PE}+} + \alpha_{\text{PE}-})$ , AFF = change in negative affect (post-stress T2<sub>AFF</sub> - baseline T1), CORT = Cortisol change (post-stress T2<sub>CORT</sub> - baseline T1) controlled for TIME = time of the day (morning vs. noon vs. afternoon);  $\rho$  = Spearman's Rho.

63

64

Table S7. Partial Pearson correlations of recovery from negative affect with the valence bias score controlled for initial change in negative affect

|                           | Recovery   AFF |      |     |                 |      |     |         |      |     |
|---------------------------|----------------|------|-----|-----------------|------|-----|---------|------|-----|
|                           | Social Stress  |      |     | Physical Stress |      |     | Control |      |     |
|                           | $r$            | $p$  | $n$ | $r$             | $p$  | $n$ | $r$     | $p$  | $n$ |
| <b>Valence Bias Score</b> | .382           | .045 | 29  | .133            | .492 | 30  | -.034   | .865 | 29  |

Note. Recovery = recovery from negative affect (post-stress T2<sub>AFF</sub> - post-learning T3), Valence bias score =  $(\alpha_{\text{PE}+} - \alpha_{\text{PE}-}) / (\alpha_{\text{PE}+} + \alpha_{\text{PE}-})$ , AFF = change in negative affect (post-stress T2<sub>AFF</sub> - baseline T1);  $r$  = Pearson's  $r$ .

65



66 **Supplementary Tables**

67

*Table S8 a. Sample characteristics*

|                                 | Social Stress |           |           | Physical Stress |           |           | Control  |           |           | Test         |          |
|---------------------------------|---------------|-----------|-----------|-----------------|-----------|-----------|----------|-----------|-----------|--------------|----------|
|                                 | <i>M</i>      | <i>Md</i> | <i>SD</i> | <i>M</i>        | <i>Md</i> | <i>SD</i> | <i>M</i> | <i>Md</i> | <i>SD</i> | <i>H</i> (2) | <i>p</i> |
| <b>Age</b>                      | 22.9          | 23        | 2.76      | 22.5            | 23        | 1.94      | 22.3     | 22        | 3.00      | 1.47         | .480     |
| <b>Self-esteem</b>              | 6.44          | 6.75      | 1.02      | 6.3             | 6.42      | 0.94      | 6.02     | 6.25      | 0.93      | 5.03         | .080     |
| <b>SIAS</b>                     | 1.91          | 1.9       | 0.51      | 1.96            | 1.92      | 0.31      | 2.02     | 2         | 0.6       | 1.23         | .540     |
| <b>Cortisol baseline</b>        | 8.04          | 7.07      | 5.22      | 6.17            | 4.88      | 4.17      | 7.3      | 5.09      | 5.89      | 1.74         | .419     |
| <b>Affective state baseline</b> | 1.27          | 1.25      | 0.33      | 1.28            | 1.25      | 0.39      | 1.4      | 1.25      | 0.39      | 3.21         | .201     |

*Note.* Sample characteristics for the three stress groups. *M* = mean; *Md* = median; *SD* = standard deviation; self-esteem assessed via averaged scores of the Self-Description Questionnaire (SDQ-III); SIAS = averaged score on the Social Interaction Anxiety Scale; *H* = Kruskal-Wallis Chi-squared.

68

69

*Table S8 b. Sample characteristics*

|                    |                  | Social Stress | Physical Stress | Control | Test                 |          |
|--------------------|------------------|---------------|-----------------|---------|----------------------|----------|
|                    |                  |               |                 |         | <i>H</i>             | <i>p</i> |
| <b>Gender</b>      | <b>female</b>    | 21            | 20              | 20      | 0.3 ( <i>df</i> =2)  | .861     |
|                    | <b>male</b>      | 8             | 10              | 10      |                      |          |
| <b>Time of day</b> | <b>morning</b>   | 10            | 10              | 10      | 1.27 ( <i>df</i> =4) | .867     |
|                    | <b>noon</b>      | 11            | 10              | 8       |                      |          |
|                    | <b>afternoon</b> | 8             | 10              | 12      |                      |          |

*Note.* Frequency distribution for gender and time of day of the measurement for the three stress groups; *H* = Pearson's Chi-squared test statistic

70

71

72

73 **References**

- 74 1. Vehtari, A., Gelman, A. & Gabry, J. Practical Bayesian model evaluation using leave-one-out  
75 cross-validation and WAIC. *Stat. Comput.* **27**, 1413–1432 (2017).

76
